# Supplementary material
Source: publisher figshare collection journal article supplement (https://acs.figshare.com/ndownloader/files/22720154)
Supplement: Supplementary file 1 [file 22720154]

## Supporting Information

Metal Assisted Protein quantitation (MAPq): Multiplex analysis of protein expression using lanthanide-modified antibodies with detection by inductively coupled plasma mass spectrometry

Sarah C. Shuck<sup>†</sup>, Cu Nguyen<sup>†</sup>, Yin Chan<sup>‡</sup>, Timothy O'Connor<sup>‡</sup>, Alexandra K. Ciminera<sup>†#</sup>,  
Michael Kahn<sup>†</sup>, John Termini<sup>†\*</sup>

<sup>†</sup>Department of Molecular Medicine, <sup>‡</sup>Department of Cancer Biology, <sup>#</sup>Irell and Manella  
Graduate School of Biological Sciences, City of Hope & Beckman Research Institute, Duarte,  
CA 91010

\*Corresponding Author: [jtermini@coh.org](mailto:jtermini@coh.org)

### Table of Contents

|                                                      | Page(s)    |
|------------------------------------------------------|------------|
| Supporting Methods                                   | S-2 -- S-5 |
| Figure S1     Antibody specificity analysis          | S-6 --S-7  |
| Table S1     Lanthanide labeling efficiency          | S-8 -- S-9 |
| Table S2     Protein determinations in SW480 cells   | S-10       |
| Table S3     Protein determinations in HEK293T cells | S-11       |
| Table S4     Protein determinations in mice liver    | S-12       |

## Supporting methods

### *Characterization of CRISPR-CAS9 XPC knockout cells*

HEK293T cells were transfected with a CRISPR-Cas9 construct targeting *XPC* (gRNA 5'-CTGCGCAGTTCGCGTCCCCG-3'). TA subcloning of the target region followed by sequencing was used to identify insertions/deletions created by gene editing. Compared to HEK293T WT reference sequence (Req#38940), the chosen XPC- clone contained a 1 bp deletion in the codon for Arg12 (denoted in red in gRNA sequence). Reduction of *XPC* mRNA in 293T XPC- cells was confirmed by qRT-PCR using SYBR® PowerUp mastermix (ThermoFisher) and the *XPC* primers Fwd 5'-agaaaatgtgcagcgatggt-3' and Rev 5'-agaacacctctagccactggtc-3'. *XPC* expression was normalized to the housekeeping gene tubulin (*TUBB*; Fwd 5'-ttcaatctccctccaagctc-3' and Rev 5'-gggaaggattccacttgaca-3'). Total protein was extracted from 293T WT and XPC- cells using urea lysis buffer (8% sucrose, 2M urea, 4% SDS). Protein (30 µg) was electrophoresed on a NuPAGE™ 4-12% Bis-Tris protein gel (ThermoFisher), transferred to PVDF membrane, blocked (5%), and probed with anti-XPC antibody (Bethyl A301-122A) and anti-β-actin antibody (CST 4970S). Signal was detected by anti-rabbit-HRP secondary antibody and chemiluminescence on a digital imager (BioRad). Additionally, XPA, XPC, and XPG protein were quantified by MAPq as described to confirm the specificity of the XPC CRISPR targeting. For phenotypic analysis, UV sensitivity was measured by exposing 293T WT and XPC- cells to increasing doses of UV-C radiation (0-50 J/m<sup>2</sup>; germicidal lamp). 3 days post-irradiation, cells were stained with crystal violet to determine % survival in irradiated wells compared to non-irradiated wells.

### *Determination of lanthanide labeling efficiency and antibody levels*

To do this, we measured the concentration of each antibody by measuring protein concentration at 280 nm absorbance. We then converted this to number of molecules of each antibody.

Lanthanide concentrations on each antibody were measured using ICP-MS and this number also converted to molecules. This allowed us to determine the number of lanthanide molecules on each antibody (Table S1). Lanthanide concentrations were then measured in each sample. Because we calculated the number of lanthanides/antibody, we were then able to determine the number of antibodies in each samples.

#### *Preparation of cell extracts for western blotting*

SW480 cells were cultured in DMEM (high glucose, 25mM), 10% FBS, and 1% penicillin-streptomycin. Cells were seeded in 100 mm plates and allowed to adhere for 24 hr prior to treatment with vehicle (0.1% DMSO) or 10 $\mu$ M ICG-001 for an additional 48 hr. Cells were harvested by washing each plate with 5 mL of ice-cold PBS twice and scraped with 1 mL ice-cold PBS into 1.5 mL Eppendorf tubes. Cells were pelleted by centrifugation at 425 *g*, 4 °C, for 5 min. Cell pellets were then stored at -80 °C until processing. Cells were separated into nuclear and cytoplasmic fractions using the NE-PER kit (Thermo Scientific) supplemented with protease inhibitor cocktail and 2 mM DTT.

HEK293T cells were cultured in DMEM with either low (5 mM) or high (25 mM) glucose supplemented with 10% FBS. Cells were conditioned in elevated glucose for a minimum of 3 weeks. Cells were seeded on 150 mm plates and allowed to adhere for 24 hr, after which plates were washed with PBS. Each dish was treated with 1 mL lysis buffer (2 M urea, 8% sucrose, 4% SDS and Roche cOmplete, EDTA-free protease inhibitor cocktail and placed on a shaker for 5 min at 4 °C. Cells were then scraped and applied to QIAshredder (Qiagen) to shear the DNA. Samples were heated to 95 °C and stored at -80 °C. Cells isolated from liver tissue (described above) were processed similarly with addition of lysis buffer directly to cell pellets. Protein concentrations were determined using the Biorad Bradford Assay kit. Cytosolic (40  $\mu$ g), or nuclear extracts (20  $\mu$ g) prepared from SW480 cells were loaded onto a 4-20% gradient Tris-Glycine protein gel (Lonza) in 2X Laemmli buffer and electrophoresed at 150 volts for 1 hr. Gels were then transferred onto PVDF membrane overnight (25 volts at 4 °C). Membranes were blocked in 5%

nonfat milk in a wash buffer (200 mM NaCl and 0.1% Tween-20 in TBS) for 1 hr at room temperature. Primary antibodies were diluted in high salt TBST (25 mM Tris pH 8, 300 mM NaCl, and 0.1% Tween (v/v)) and added to the membranes. Membranes were then incubated at 4 °C with gentle rocking on a Heidolph rotator overnight after which membranes were washed 4x at room temperature for 30 min with high salt TBST. Secondary antibodies conjugated to HRP were added at a dilution of 1:20,000 in high salt TBST and incubated for 1 hr at room temperature. After 30 min of washing in wash buffer, membranes were subjected to ECL substrate (GE Healthcare) and visualized using a Biorad Gel Documentation System. HEK293T and liver cell extracts (30 µg) were loaded onto a 4-12% gradient Bis-Tris protein gel (NuPAGE) in SDS-PAGE loading buffer (62.5 mM Tris, pH 8.0, 1.5% SDS, 8% glycerol, 0.005% bromophenyl blue) and electrophoresed at 150 volts for 90 min. Gels were then transferred onto PVDF membranes overnight (20 volts at 4 °C). Membranes were incubated with blocking buffer (5% blocking powder (Bio-Rad) in PBS + 0.05% Tween-20) for 1 hr and then incubated with primary antibodies diluted (1:1000) in blocking buffer overnight at 4 °C. Blots were then washed 3x 5 min with PBS + 0.05% Tween-20 and secondary antibodies (IRDye® 680RD goat anti-rabbit or IRDye® 800RD goat anti-mouse) were diluted (1:10,000) in blocking buffer added for 1 hr. Blots were then washed again and visualized using the Odyssey CLx Infrared Imaging System (LI-COR Biosciences).

#### *Animal care and tissue collection*

*Lepr<sup>wt/db</sup>* mice derived from C57BL/6J stock from the Jackson Laboratories were bred for 5 generations with C57BL/6 mice obtained from the City of Hope Animal Resource Center as previously described to obtain *Lepr<sup>db/db</sup>* mice.<sup>23</sup> DNA was isolated from 1 to 2 mm tail snips and genotyped as previously described.<sup>23</sup> At 26 weeks of age, *Lepr<sup>wt/wt</sup>* and *Lepr<sup>db/db</sup>* mice were euthanized and perfused with PBS (pH 8) for isolation of liver tissue. Samples were immediately flash frozen in liquid nitrogen and stored at -80 °C. Livers were collected from 5 *Lepr<sup>wt/wt</sup>* and 5 *Lepr<sup>db/db</sup>* mice. All procedures were approved under City of Hope IACUC Protocol #02016.

#### *Cell isolation from liver tissue*

The Miltenyi gentleMACs liver dissociation kit (Miltenyi 130-105-807) was used to dissociate cells from 100 mg of liver tissue according to the manufacturer's instructions. After enzyme addition, tissue was placed into gentleMACS C tubes (Miltenyi 130-093-237) and cells isolated using the Miltenyi gentleMACS Octo Dissociator with heating (Miltenyi 130-096-427) using program 37C\_m\_LIDK\_1. Cells were counted using a hemocytometer, suspended in 10% DMSO, and frozen at -80 °C. Isolated cells were fixed, permeabilized, and probed with antibodies as described above. An average of  $5 \times 10^7$  cells were isolated per 100 mg of liver tissue.

#### *Image pixilation*

Western blot images, saved as tiff files, were analyzed using the UN-SCAN-IT version 5.1 software from Silk Scientific Inc. Images were loaded into the software and individual protein bands were highlighted and assigned pixel values based on intensity. Pixel values for each band were then analyzed using Excel and plotted using GraphPad Prism software. Data represents two independent replicates.

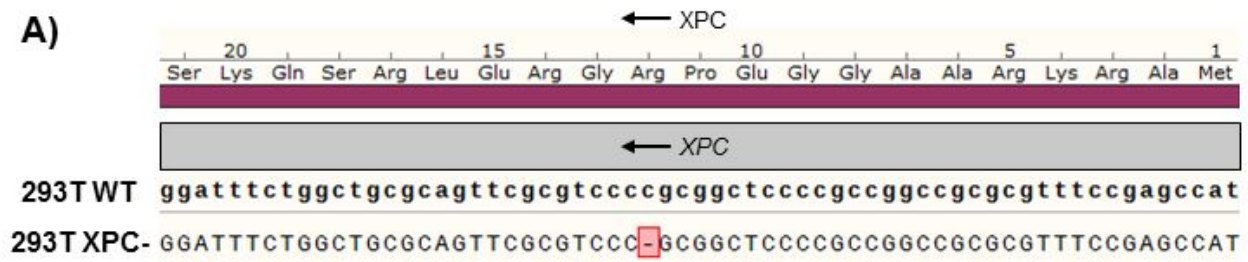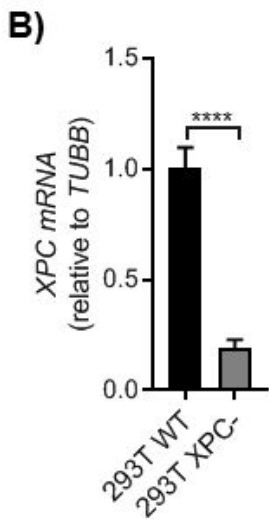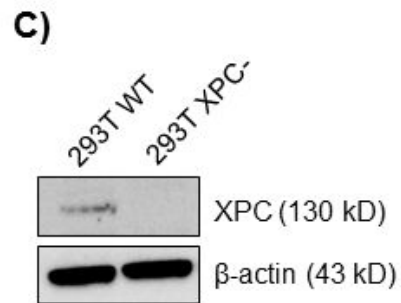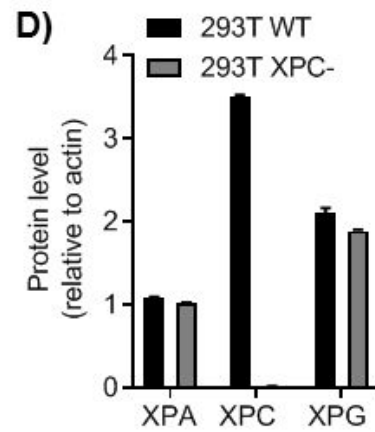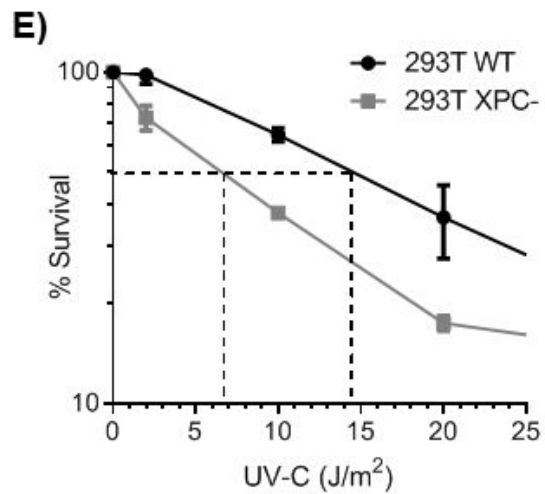

**Figure S1. Analysis of antibody specificity in XPC CRISPR-CAS9 knockdown cells.**

HEK293T WT cells were transfected with a CRISPR-Cas9 construct targeting XPC. A) T/A subcloning revealed a 1bp deletion in Arg12 in 293T XPC- cells (Req#38940). Knock out was confirmed by B) qRT-PCR (n=6; paired t test), C) Western blot, and D) MAPq protein analysis. The non-targeted XP proteins XPA and XPG were also measured by MAPq to confirm that they were not impacted by gene editing. E) For phenotypic analysis, UV sensitivity was measured by exposing 293T WT and XPC- cells to increasing doses of UV-C radiation. Surviving cells were assessed by crystal violet staining; dashed lines indicate 50% survival.

| <b>Antibody</b> | <b>Lanthanide label</b> | <b>Total amount of labeled antibody (molecules)</b> | <b>Total amount of lanthanide (molecules)</b> | <b>Lanthanides/ Antibody</b> |
|-----------------|-------------------------|-----------------------------------------------------|-----------------------------------------------|------------------------------|
| Actin           | Yb <sup>171</sup>       | 2.33e13±1.18e11                                     | 1.241e15±0.98e13                              | 53.12±1.22                   |
| AKT             | Nd <sup>146</sup>       | 4.19e13±2.78e11                                     | 2.82e15±1.77e13                               | 67.32±0.96                   |
| p-AKT           | Tb <sup>159</sup>       | 3.29e13±2.61e11                                     | 2.51e15±1.06e13                               | 76.31±0.50                   |
| Alpha tubulin   | Eu <sup>151</sup>       | 8.55e13±9.77e11                                     | 4.46e15±7.93e13                               | 52.44±1.08                   |
| β-Catenin       | Sm <sup>147</sup>       | 1.19e12±2.88e10                                     | 6.67e13±3.44e11                               | 56.19±2.74                   |
| CBP             | Gd <sup>156</sup>       | 5.62e12±2.02e11                                     | 2.35e14±6.06e12                               | 43.61±1.70                   |
| CSB             | Er <sup>167</sup>       | 7.40e13±6.51e11                                     | 4.20e15±1.81e13                               | 56.88±0.72                   |
| EGLN3           | Nd <sup>148</sup>       | 7.84e13±3.35e11                                     | 5.23e15±1.60e13                               | 66.67±0.24                   |
| EphB2           | Dy <sup>164</sup>       | 4.12e12±8.89e10                                     | 1.11e14±4.16e12                               | 26.86±0.55                   |
| Ephrin B2       | Gd <sup>160</sup>       | 4.16e12±8.39e10                                     | 2.76e14±6.32e12                               | 66.22±0.23                   |
| ERK             | Yb <sup>174</sup>       | 5.18e13±3.72e11                                     | 3.38e15±4.04e13                               | 65.22±0.48                   |
| p-ERK           | Ho <sup>165</sup>       | 9.11e13±5.95e11                                     | 8.98e15±3.48e13                               | 98.59±0.30                   |
| esRAGE          | Tm <sup>169</sup>       | 5.23e13±3.75e11                                     | 2.08e15±3.55e13                               | 39.65±0.40                   |
| GAPDH           | Nd <sup>150</sup>       | 9.85e13±3.19e11                                     | 4.81e15±1.28e13                               | 48.78±0.11                   |
| Glo1            | Eu <sup>153</sup>       | 4.19e13±5.57e10                                     | 1.95e15±3.51e13                               | 46.62±0.89                   |
| HIF1-α          | Dy <sup>161</sup>       | 6.70e13±1.45e12                                     | 1.85e15±1.22e14                               | 27.65±1.41                   |
| NFκB            | Pr <sup>141</sup>       | 6.13e13±5.18e11                                     | 7.01e15±6.15e13                               | 114.44±1.87                  |
| P300            | Dy <sup>162</sup>       | 5.57e12±5.67e10                                     | 1.64e14±3.28e12                               | 28.83±0.84                   |
| p38             | Sm <sup>154</sup>       | 3.36e13±2.47e11                                     | 2.27e15±8.72e12                               | 67.38±0.58                   |
| p-p38           | Nd <sup>144</sup>       | 7.63e13±1.16e12                                     | 3.64e15±1.27e13                               | 47.72±1.66                   |
| PDGFA           | E <sup>168</sup> r      | 9.11e13±9.17e11                                     | 6.25e15±5.64e13                               | 68.61±1.30                   |



|          |                   |                 |                 |             |
|----------|-------------------|-----------------|-----------------|-------------|
| RAGE     | Lu <sup>175</sup> | 9.57e13±4.85e11 | 7.24e15±5.02e13 | 75.66±0.90  |
| S100A4   | Er <sup>166</sup> | 4.07e12±5.22e10 | 8.76e13±7.57e11 | 21.52±0.17  |
| Survivin | Er <sup>170</sup> | 3.96e12±6.01e10 | 5.66e14±6.95e12 | 143.21±2.78 |
| XPA      | Yb <sup>172</sup> | 3.16e13±4.72e11 | 2.62e15±9.06e13 | 82.83±3.90  |
| XPC      | Dy <sup>163</sup> | 5.12e13±9.51e11 | 9.78e14±2.27e13 | 19.13±0.59  |
| XPC      | Nd <sup>142</sup> | 1.20e13±5.31e11 | 1.14e15±5.96    | 95.59±3.35  |
| XPG      | Gd <sup>155</sup> | 9.57e13±2.52e10 | 6.76e15±3.12e13 | 70.62±0.33  |
| VEGF     | Gd <sup>157</sup> | 6.67e13±4.47e11 | 4.42e15±9.69e13 | 66.29±1.03  |

**Table S1. Lanthanide-antibody labeling efficiency.** Lanthanide-conjugated antibodies were analyzed using ICP-MS and total amount of lanthanide in each sample determined. This number was then normalized to the total amount of antibody in each sample to calculate the number of lanthanides/antibody. Three independent experiments revealed a coefficient of variation ≤10%.

| <b>Antibody</b>                    | <b>Vehicle<br/>(ng/mL)</b> | <b>ICG-001 (ng/mL)</b> | <b>Vehicle<br/>Protein/Actin<br/>ratio</b> | <b>ICG-001<br/>Protein/Actin<br/>ratio</b> |
|------------------------------------|----------------------------|------------------------|--------------------------------------------|--------------------------------------------|
| $\beta$ -Catenin Sm <sup>147</sup> | 0.020 $\pm$ 0.009          | 0.022 $\pm$ 0.005      | 0.147 $\pm$ 0.023                          | 0.121 $\pm$ 0.052                          |
| CBP Gd <sup>156</sup>              | 0.034 $\pm$ 0.006          | 0.021 $\pm$ 0.009      | 0.183 $\pm$ 0.040                          | 0.157 $\pm$ 0.018                          |
| Ephrin B2 Gd <sup>160</sup>        | 0.013 $\pm$ 0.004          | 0.012 $\pm$ 0.004      | 0.065 $\pm$ 0.009                          | 0.097 $\pm$ 0.020                          |
| P300 Dy <sup>162</sup>             | 0.025 $\pm$ 0.0054         | 0.013 $\pm$ 0.004      | 0.136 $\pm$ 0.027                          | 0.104 $\pm$ 0.005                          |
| EphB2 Dy <sup>164</sup>            | 0.021 $\pm$ 0.007          | 0.023 $\pm$ 0.001      | 0.173 $\pm$ 0.052                          | 0.132 $\pm$ 0.56                           |
| S100A4 Er <sup>166</sup>           | 0.018 $\pm$ 0.003          | 0.016 $\pm$ 0.005      | 0.147 $\pm$ 0.027                          | 0.098 $\pm$ 0.049                          |
| Survivin Er <sup>170</sup>         | 0.012 $\pm$ 0.003          | 0.008 $\pm$ 0.005      | 0.096 $\pm$ 0.018                          | 0.045 $\pm$ 0.021                          |

**Table S2. Average quantitative protein measurements from ICP-MS in vehicle (0.1% DMSO) and ICG-001 treated SW480 cells.**

| <b>Antibody</b>          | <b>5 mM Glucose<br/>(ng/mL)</b> | <b>25 mM Glucose<br/>(ng/mL)</b> | <b>5 mM<br/>protein/actin<br/>ratio</b> | <b>25 mM<br/>protein/actin<br/>ratio</b> |
|--------------------------|---------------------------------|----------------------------------|-----------------------------------------|------------------------------------------|
| XPA Yb <sup>172</sup>    | 1.390 ± 0.012                   | 0.448 ± 0.009                    | 0.110 ± 0.001                           | 0.086 ± 0.003                            |
| XPC Dy <sup>163</sup>    | 2.289 ± 0.003                   | 0.593 ± 0.010                    | 0.181 ± 0.001                           | 0.114 ± 0.003                            |
| XPG Gd <sup>155</sup>    | 2.189 ± 0.151                   | 0.574 ± 0.023                    | 0.173 ± 0.012                           | 0.110 ± 0.005                            |
| HIF-1α Dy <sup>161</sup> | 2.686 ± 0.142                   | 0.845 ± 0.012                    | 0.213 ± 0.011                           | 0.162 ± 0.004                            |

**Table S3. Average quantitative protein measurements from ICP-MS in HEK293T cells in 5 mM and 25 mM glycemic conditions.**

| <b>Antibody</b>          | <b>Lepr<sup>wt/wt</sup></b> | <b>Lepr<sup>db/db</sup></b> | <b>Lepr<sup>wt/wt</sup><br/>protein/actin<br/>ratio</b> | <b>Lepr<sup>db/db</sup><br/>protein/actin<br/>ratio</b> |
|--------------------------|-----------------------------|-----------------------------|---------------------------------------------------------|---------------------------------------------------------|
| XPA Yb <sup>172</sup>    | 0.035 ± 0.018               | 0.029 ± 0.005               | 0.558 ± 0.189                                           | 0.357 ± 0.036                                           |
| XPC Dy <sup>163</sup>    | 0.015 ± 0.01                | 0.012 ± 0.003               | 0.220 ± 0.033                                           | 0.149 ± 0.018                                           |
| XPG Gd <sup>155</sup>    | 0.043 ± 0.026               | 0.038 ± 0.010               | 0.649 ± 0.136                                           | 0.462 ± 0.057                                           |
| HIF-1α Dy <sup>161</sup> | 0.038 ± 0.024               | 0.028 ± 0.009               | 0.586 ± 0.159                                           | 0.336 ± 0.064                                           |

**Table S4. Average quantitative protein measurements from ICP-MS in Lepr<sup>wt/wt</sup> and Lepr<sup>db/db</sup> mice.**
